# Supplementary material for: Synthesis, structure and luminescent properties of a new blue-green-emitting garnet phosphor Ca2LuScZrAl2GeO12:Ce3+
Source: Royal Society of Chemistry journal article supplement (doi:10.1039/c6ra11258g), 2016-01-01
Supplement: c6ra11258g1.pdf [file c6ra11258g1.pdf]

Electronic Supplementary Material (ESI) for Journal of RSC Advances.

This journal is © The Royal Society of Chemistry 2016

Electronic Supplementary Material (ESI) for RSC Advances

## Supporting information

### Synthesis, structure and luminescent properties of a new blue-green-emitting garnet phosphor $\text{Ca}_2\text{LuScZrAl}_2\text{GeO}_{12}:\text{Ce}^{3+}$

Yaling Zheng,<sup>a,b</sup> Weidong Zhuang,<sup>\*a</sup> Xianran Xing,<sup>b</sup> Jiyou Zhong,<sup>a,b</sup> Ronghui Liu,<sup>a</sup> Yanfeng Li,<sup>a</sup> Yuanhong Liu,<sup>a</sup> Yunsheng Hu<sup>a</sup>

a Address here. Address here National Engineering Research Center for Rare Earth Materials, General Research Institute for Nonferrous Metals, and Grirem Advanced Materials Co., Ltd., Beijing 100088, People's Republic of China.

b Department of Physical Chemistry, University of Science & Technology Beijing, Beijing 100083, People's Republic of China.

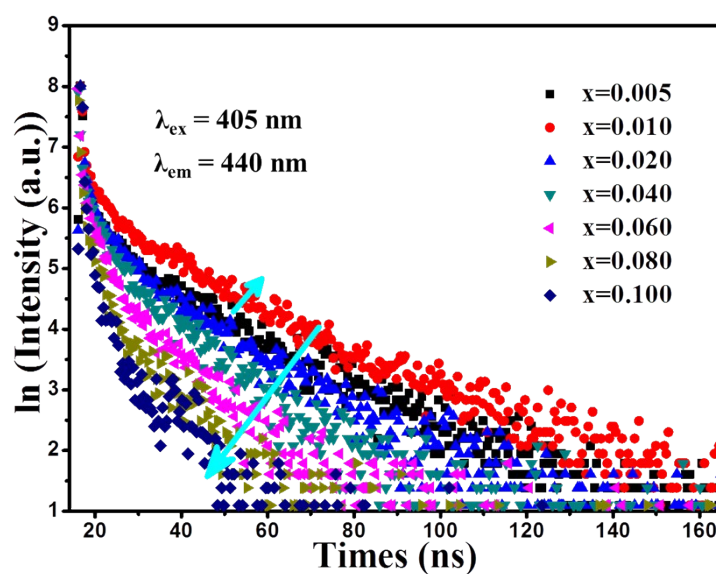

Fig. S1 Decay curves of  $\text{Ca}_{2-x}\text{LuZrScAl}_2\text{GeO}_{12}:\text{xCe}^{3+}$  phosphor with varying  $\text{Ce}^{3+}$  concentrations ( $\lambda_{\text{em}} = 440 \text{ nm}$ ).

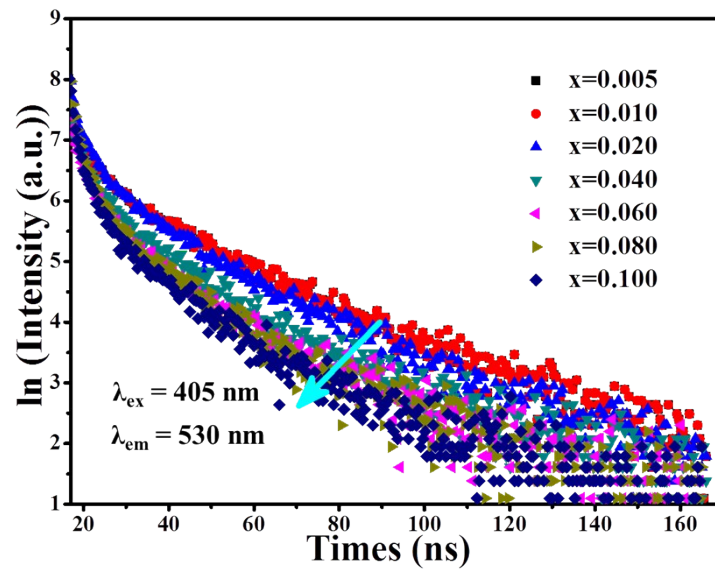

Fig. S2 Decay curves of  $\text{Ca}_{2-x}\text{LuZrScAl}_2\text{GeO}_{12}:x\text{Ce}^{3+}$  phosphor with varying  $\text{Ce}^{3+}$  concentrations ( $\lambda_{em} = 530 \text{ nm}$ ).
